# Supplementary material for: Neocortical Rebound Depolarization Enhances Visual Perception
Source: PLoS Biol. 2015 Aug 14;13(8):e1002231. doi: 10.1371/journal.pbio.1002231 (PMC4537103; doi:10.1371/journal.pbio.1002231)
Supplement: S11 Data — Excel spreadsheet containing the underlying numerical data for S6 Fig. Raw and mean recording traces used in S6B Fig, individual values used to plot means ± SEMs of S6B and S6C Fig, and individual values used to plot S6D and S6E Fig are contained. (XLSX) [file pbio.1002231.s011.xlsx]

## Sheet: Sheet1
S6 Fig.
											S6 Fig.B											S6 Fig.C											S6 Fig.C											S6 Fig.C
S6 Fig.B											Cell 155											Cell 313											Cell 474											Cell 502
	Flash (-)					Flash +)					Grating					Flash+Drift						Grating					Flash+Drift						Grating					Flash+Drift						Grating					Flash+Drift
	Time (s)	90	45	0	-45	90	45	0	-45		-90	-45	0	45	90	-90	-45	0	45	90		-90	-45	0	45	90	-90	-45	0	45	90		-90	-45	0	45	90	-90	-45	0	45	90		-90	-45	0	45	90	-90
	-2.4	1.1889	1.2969	1.1422	0.8922	1.1398	0.958	1.2004	1.1835		0.191219	0.138974	0.409096	-0.193636	0.191219	1.0709	2.50516	4.57023	0.288065	1.0709		0.947724	0.384185	-0.552625	-0.445888	0.947724	2.13746	-0.217101	-0.227734	0.138241	2.13746		-1.33467	0.0979173	0.852198	-0.34713	-1.33467	0.570101	-0.187848	-0.649195	0.101117	0.570101		0.923042	0.916915	0.14561	-0.243684	0.923042	0.443054
	-2.2	1.1247	1.2497	1.3706	0.9818	0.9691	1.0001	1.0383	0.9455		-0.169392	0.0851333	-0.381762	0.520066	-0.169392	-0.147923	2.49252	0.511627	0.284365	-0.147923		-0.269525	0.218801	3.21054	-0.193602	-0.269525	-0.263505	2.68736	5.12717	0.987879	-0.263505		-0.234048	-0.314373	-0.418882	0.771639	-0.234048	-0.295225	0.142319	-0.0303298	0.231646	-0.295225		0.176144	-0.197012	-0.288732	-0.099999	0.176144	1.38893
	-2	1.021	0.9876	1.3282	0.9183	0.8964	1.0273	0.9403	1.0195		0.0490694	0.0884642	0.499279	2.52239	0.0490694	2.25386	-0.352317	0.585546	0.0620991	2.25386		-0.248842	6.51823	0.0679908	-0.49156	-0.248842	0.0114729	4.69693	2.46187	0.276946	0.0114729		-0.0385155	0.852304	-0.331608	-0.602743	-0.0385155	-0.291273	-0.223337	0.594421	-0.615706	-0.291273		-0.130041	-0.534819	0.415493	0.492319	-0.130041	-0.247382
	-1.8	1.0737	0.8474	1.2534	1.0552	0.9612	1.0327	0.905	0.8761		1.98112	0.224996	0.058073	0.904424	1.98112	0.397806	1.51804	0.206866	1.83894	0.397806		3.25753	0.298913	-0.505176	0.483481	3.25753	3.80628	0.346203	0.778903	0.799938	3.80628		-0.188764	-0.394967	-0.331487	0.0836602	-0.188764	0.165867	-0.173631	0.874694	0.228965	0.165867		-0.430511	0.35045	0.75799	-0.50629	-0.430511	0.501142
	-1.6	1.0051	0.758	1.0754	0.8419	0.96	1.1018	0.7772	1.0568		0.00839245	2.7125	-0.367405	0.176607	0.00839245	0.0472723	-0.000185968	0.38264	0.207268	0.0472723		0.941413	0.362568	-0.0321942	0.275438	0.941413	1.42925	0.298084	1.23534	-0.628517	1.42925		-0.428591	0.453714	-0.386868	0.326283	-0.428591	-0.268737	0.333656	-0.328183	0.233549	-0.268737		0.370178	-0.334666	-0.453146	0.692304	0.370178	1.0684
	-1.4	1.0454	0.9696	1.0271	0.9883	1.0812	1.0364	0.92	1.0206		0.94342	-0.184258	0.135972	0.549232	0.94342	1.29683	0.403689	0.88383	0.360185	1.29683		1.69459	2.60614	-0.0146772	0.367663	1.69459	0.910245	0.303775	-0.008257	1.3881	0.910245		-0.213193	0.885458	-0.231704	-0.855607	-0.213193	-0.78606	0.542927	0.0555574	-0.928707	-0.78606		0.253583	0.686776	0.715181	0.591229	0.253583	-0.16331
	-1.2	0.9971	0.9726	1.0012	0.9214	0.9589	1.0609	0.9306	1.0491		4.22341	1.64861	0.204081	0.270515	4.22341	1.08715	0.0627469	-0.0435458	1.70191	1.08715		-0.49084	0.146414	0.330177	0.933499	-0.49084	0.867072	1.91118	0.827475	0.3175	0.867072		0.551274	-0.144095	-0.264455	-0.260027	0.551274	0.562365	-0.0237929	0.00901962	1.59473	0.562365		1.07518	0.0884313	0.998201	-0.679826	1.07518	-0.188351
	-1	0.9948	1.1458	1.0069	1.0185	0.9954	0.9568	1.0699	1.0191		0.658887	1.64317	0.571627	0.879022	0.658887	0.922616	0.64347	1.08514	0.717993	0.922616		-0.527119	0.910332	-0.511861	0.262439	-0.527119	-0.441247	1.15759	0.43447	0.303918	-0.441247		1.1719	-0.356332	0.976441	-0.636668	1.1719	2.5219	-0.330458	0.250063	-0.404912	2.5219		0.235212	0.320454	1.33749	-0.00414804	0.235212	0.485864
	-0.8	0.9256	0.8935	0.9279	1.0913	0.9105	0.8945	1.0735	0.9137		0.432237	0.0869047	1.41401	0.359581	0.432237	0.953142	-0.116605	0.96656	0.0123255	0.953142		-0.0109608	2.02706	0.332257	-0.620739	-0.0109608	1.31424	1.72876	-0.253833	-0.314675	1.31424		-0.551745	-0.620186	0.292927	0.0334673	-0.551745	0.28552	0.182443	1.99883	0.0767448	0.28552		-0.701106	-0.0644964	0.0727044	-0.353637	-0.701106	0.335692
	-0.6	0.9107	0.9649	0.7424	1.1021	1.0369	0.9178	1.0908	0.9848		0.846187	0.486144	0.350495	-0.677169	0.846187	2.34587	1.09079	1.66387	0.939259	2.34587		0.479146	-0.312777	0.721123	-0.339017	0.479146	1.41257	-0.230417	-0.356346	2.28565	1.41257		0.182489	-0.896024	-0.528822	1.84376	0.182489	-0.195757	0.141441	2.00947	-0.239347	-0.195757		-0.275421	-0.369904	-0.213193	0.306387	-0.275421	0.298857
	-0.4	0.7988	0.8687	0.5991	1.1011	1.0032	0.9855	1.0289	1.0091		0.251413	0.458603	-0.371343	1.02242	0.251413	0.447725	0.176605	8.42047	0.0799452	0.447725		1.50169	1.70963	0.31709	2.8419	1.50169	0.128483	0.0546952	5.98233	-0.569145	0.128483		-0.32247	0.0755896	-0.12549	0.231972	-0.32247	0.320888	0.390063	-0.300248	0.952576	0.320888		1.35425	-0.203962	0.935555	-0.287284	1.35425	-0.0746327
	-0.2	0.9141	1.0453	0.5256	1.0878	1.0875	1.0283	1.0252	0.9222		-0.302918	0.310504	-0.0890463	0.756247	-0.302918	2.02427	-0.814481	0.77157	-0.381314	2.02427		-0.152724	1.67332	0.32732	0.220219	-0.152724	1.14728	-0.385431	-0.104329	0.595121	1.14728		0.52464	-0.198837	-0.362607	-0.146913	0.52464	-0.768278	0.616056	0.537102	-0.333245	-0.768278		-0.261274	-0.821009	-0.620265	0.0942079	-0.261274	-0.328915
	0	0.9338	1.1222	0.6708	1.0543	0.993	1.0924	0.9323	0.8716		0.874463	1.32538	-0.261425	-0.0694419	0.874463	0.861003	0.588091	0.227799	-0.324968	0.861003		1.03166	0.426885	5.46352	-0.719682	1.03166	0.278899	0.0440895	9.80282	0.146255	0.278899		0.35733	0.0330738	-0.0158597	0.105728	0.35733	-0.177247	0.0985577	0.193916	-0.611037	-0.177247		0.15167	0.163482	-0.0234518	3.57507	0.15167	-0.551745
	0.2	1.1393	1.1154	0.8669	1.0844	1.0015	1.0013	0.8674	0.5527		1.17879	4.91298	0.155236	-0.0136477	1.17879	0.33462	1.12898	1.25192	1.11804	0.33462		0.638633	3.04352	-0.518306	0.323199	0.638633	-0.124709	-0.0218625	1.30561	-0.554116	-0.124709		0.815627	-0.654284	0.39033	1.11067	0.815627	-0.504588	-0.0280334	0.594378	-0.461876	-0.504588		0.0479622	0.0516976	-0.00741611	-0.257857	-0.267842	-0.0151297
	0.4	1.2332	1.1521	1.0913	1.0772	1.0668	1.0941	0.7852	0.619													-0.410967	-0.123686	-0.0363723	-0.647394	-0.410967	2.65052	-0.0932417	0.0559807	-0.426794	2.65052		0.00782079	0.441918	-0.00819408	0.217582	0.00782079	2.71832	0.0407677	-0.0310213	-0.416622	2.71832		-0.176552	-0.2374	0.644246	0.0138216	-0.176552	-0.409272
	0.6	1.4441	1.1418	1.3048	1.1499	1.1906	1.1892	0.9478	0.5988													0.438113	1.59531	1.17694	-0.31518	0.438113	-0.498985	0.0248571	0.319764	-0.483264	-0.498985		-0.573519	0.0986943	-0.13589	-0.182427	-0.573519	-0.308249	0.725511	0.162986	0.513711	-0.308249		-0.589863	-0.517662	-0.411117	-0.867477	-0.589863	-0.0667293
	0.8	1.7024	1.3393	1.3038	1.1825	1.3976	1.554	0.9744	1.0334																								2.71149	1.3453	-0.0567222	0.0660634	2.71149							-0.376308	0.0235479	0.226034	-0.252663	-0.376308	0.109227
	1	2.0698	1.4821	1.3935	1.2141	1.5908	1.8701	1.2825	1.3344																								-0.32804	-0.617319		-0.509975	-0.32804							0.569015	1.50975	0.602305	0.627787	0.569015	0.191479
	1.2	2.2605	1.7369	1.3291	1.2768	1.693	2.2145	1.3263	1.9815
	1.4	2.4497	1.931	1.5031	1.2749	1.8788	2.473	1.5562	2.424
	1.6	2.3906	2.0911	1.5003	1.1964	1.7504	2.4636	1.793	3.044
	1.8	2.4047	2.2396	1.7218	1.1394	1.97	2.4338	1.7577	3.277
	2	2.3531	2.2622	1.7571	1.0705	1.8216	2.2243	2.1237	3.6203
	2.2	2.2534	2.2488	1.8041	1.1488	2.0349	2.1992	1.7974	3.4281
	2.4	2.1603	2.1486	1.7962	1.1071	1.9335	2.2019	2.0806	3.4949
	2.6	1.8839	1.9653	1.608	1.2121	2.0416	2.2242	1.6359	3.132
	2.8	1.7425	1.9244	1.6482	1.0764	1.9426	2.3169	1.784	3.0752
	3	1.6043	1.7268	1.3434	1.0746	1.9068	2.0817	1.3566	2.5812
	3.2	1.5912	1.7694	1.3564	1.051	1.8534	2.009	1.404	2.6175
	3.4	1.5694	1.6077	1.1252	1.0832	1.7957	1.7465	1.1509	2.2995
	3.6	1.6035	1.5169	1.2478	1.1511	1.745	1.7941	1.2311	2.5868
	3.8	1.6134	1.4621	1.2529	0.9916	1.6814	1.7742	1.217	2.4218
	4	1.6951	1.312	1.4228	0.9491	1.4875	1.8744	1.2175	2.5813
	4.2	1.8863	1.4074	1.4401	0.7852	1.4078	1.7667	1.3873	2.3544
	4.4	2.061	1.2358	1.3947	0.8254	1.0927	1.6018	1.3352	2.2351
	4.6	2.1943	1.3532	1.3644	0.7895	1.1378	1.3975	1.5566	2.1823
	4.8	2.0121	1.2022	1.3058	0.8275	0.8587	1.4097	1.4495	1.9952
	5	1.8469	1.3053	1.4245	0.7951	1.0317	1.4268	1.5156	2.0622
	5.2	1.4954	1.2123	1.3445	0.8243	0.8087	1.4665	1.3657	1.7775
	5.4	1.4333	1.2997	1.3879	0.8724	0.9537	1.4278	1.3517	1.8788
	5.6	1.3152	1.2971	1.3254	0.966	0.905	1.244	1.2941	1.7832
	5.8	1.3804	1.3496	1.3879	1.0295	1.1396	1.2214	1.247	1.7831
	6	1.2663	1.4076	1.4639	0.9054	1.2146	1.0704	1.2922	1.6617
	6.2	1.1612	1.3086	1.4664	0.863	1.3818	1.1375	1.1061	1.3943
	6.4	1.0092	1.297	1.4496	0.6263	1.2853	1.0436	1.377	1.41
	6.6	1.0416	1.1761	1.3415	0.6411	1.4299	1.14	1.1575	1.5097
	6.8	1.1219	1.2786	1.1773	0.5139	1.2909	1.2234	1.4262	1.8015
	7	1.3595	1.2442	1.3183	0.5804	1.59	1.2292	1.1457	2.0298
	7.2	1.3489	1.3032	1.236	0.5534	1.4017	1.2939	1.3879	2.0371
	7.4	1.5653	1.1587	1.5215	0.5825	1.5527	1.1337	1.2233	2.0145
	7.6	1.3969	1.1424	1.4094	0.7104	1.1829	1.1606	1.4079	2.0394
	7.8	1.4307	0.957	1.5286	0.856	1.2342	0.9171	1.2601	2.005
	8	1.1606	1.0334	1.4262	1.0097	1.0998	1.0267	1.2204	2.1136
	8.2	1.0067	0.988	1.3645	1.0637	1.2234	0.9028	1.0267	1.8987
	8.4	0.9718	1.1035	1.3348	1.0692	1.276	1.1632	0.9544	1.7859
[truncated: 8 more columns]
